# Supplementary material for: Awareness And Knowledge Of ‘The Kerala Healthcare Service Persons And Healthcare Service Institutions (Prevention Of Violence And Damage To Property) Amendment Act, 2023’: A Cross-Sectional Study Among Medical Students in South Kerala
Source: Research Square preprint supplement (doi:10.21203/rs.3.rs-6281056/v1), 2025-05-20
Supplement: Supplementary file 1 [file c2a855459acfcc4198203418.docx]

**INFORMED CONSENT FORM (English)**

**Study title:**

Awareness and Knowledge on “Kerala Healthcare service persons and healthcare institutions (Prevention of violence and damage of property) Amendment Act, 2023”

We, third year medical students, are conducting research on “Kerala Healthcare Service Persons and Healthcare Service Institutions (Prevention of violence and damage of property) Amendment Act, 2023” This research involves assessing the knowledge and awareness about this Act among medical students. If you are willing to participate in this questionnaire research, administered as a Google Form, please indicate your willingness below.

Your identifying information will not be revealed to anybody other than those involved in the research. Any publication resulting from this research will be in a summarized form and will not have any information that can be identified with you.

- Yes, I am willing to participate and provide consent for publication.
- No, I am not willing to participate.


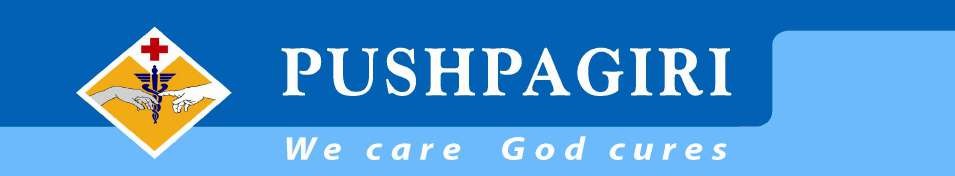


PUSHPAGIRI INSTITUTE OF MEDICAL SCIENCES & RESEARCH CENTRE, TIRUVALLA – 689101, KERALA**.**

**INSTITUTIONAL ETHICS COMMITTEE**

**(EC Reg No. With DHR EC/NEW/Inst/2020/1188)**

**No. PIMSRC/E1/388A/85/202316th September-2023**

To,

Anita Ann Thomas,

MBBS, Dept. of UG,

PIMS & RC, Tiruvalla.

Dear Anita Ann Thomas,

**Sub: Ethics Committee Clearance for new project proposal – reg:**

**Ref: Project title –** “Awareness and Knowledge on “Kerala healthcare service persons and healthcare service institutions Act 2012” among medical students in South Kerala”

At the Institutional Ethics Committee (IEC) meeting held on September 16, 2023, the above-mentioned project was reviewed and discussed. After consideration, the Committee has decided to approve and grant clearance for the aforementioned study.

The members who attended the meeting at which your protocol was discussed are:

1. Dr. Thomas Mathew, Chairman (IEC), Chirackal, JP Nagar, RSPO, Tiruvalla
2. Adv. Sooraj Shaji, Advocate (IEC), High Court, Kochi
3. Dr. Tomy Philip, Principal, PIMS & RC
4. Dr. Santhosh Pillai, Professor & HOD, Department of Pharmacology, PIMS & RC
5. Dr. Sreeja Nair, Assistant Professor, Department of Microbiology, PIMS & RC, Tiruvalla.
6. Dr. Vikram Gowda N R, Vice Principal, PIMS & RC

Yours sincerely,
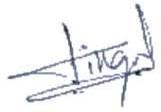

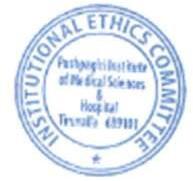


Dr Vikram Gowda N R,

In charge Member Secretary, Institutional Ethics Committee, PIMS & RC, Tiruvalla

**PUSHPAGIRI INSTITUTE OF MEDICAL SCIENCES & RESEARCH CENTRE, TIRUVALLA – 689 101, KERALA. TEL. (+)91-469-2733761 (DIR.), 2600019 (OFF.), 2700755 (Extn: 555, 556, 557, 558), FAX. 2600020.**

**E-mail:** [**pcm@pushpagiri.in,**](mailto:pcm@pushpagiri.in) **web:** [**www.pimsrc.edu.in**](http://www.pimsrc.edu.in/)
