# Supplementary material for: Awareness And Knowledge Of ‘The Kerala Healthcare Service Persons And Healthcare Service Institutions (Prevention Of Violence And Damage To Property) Amendment Act, 2023’: A Cross-Sectional Study Among Medical Students in South Kerala
Source: Research Square preprint supplement (doi:10.21203/rs.3.rs-6281056/v1), 2025-05-20
Supplement: Supplementary file 2 [file cac0b14f675730434e532cf2.docx]

Questionnaire -healthcare workers violence study

**ANNEXURE**

1. PROFORMA
2. QUESTIONNAIRE

**PROFORMA**

- Name
- Age
- Gender
- Batch

**QUESTIONNAIRE**

1. Have you heard about “Kerala Healthcare service persons and healthcare institutions (Prevention of violence and damage of property) Amendment Act, 2023”?

a. Yes

b. No

2. If yes, what was the source of your awareness on the said Act?

a. News

b. Newspaper

c. Internet

d. social media

e. Others

3. Healthcare service institutions include all except:

a. Private hospitals

b. Private nursing homes

c. Clinics

d. Private maternity homes

e. None of the above

4. Healthcare service person includes all except:

a. Registered medical practitioners.

b. Registered nurses

c. Medical and nursing students

d. Paramedical workers

e. House surgeons

f. cleaning lady

g. None of the above

5. Violence includes all except:

a. Damage or loss of property- breaking glass window of casualty

b. Harm or injury endangering life- stabbing a nurse.

c. Intimidation – threatening to stab a doctor.

d. Obstruction or hindrance- preventing a doctor from treating other patients.

e. None of the above

6. Any offender who attempts to commit violation of Section 3 (Prohibition of violence) is punishable for:

a. 6 months to 3 years

b. 6 months to 5 years

c. 6 months to 7 years

d. 6 months to10 years

7. Any offender who commits serious physical violation of Section 3 is punishable for:

a. 1 year to 5 years

b. 1 year to 6 years

c. 1 year to 7 years

d. 1 year to 9 years

8. Any offender who has damaged the property of the healthcare service institutions shall be liable to pay:

a. Same amount of purchase price of equipment damaged.

b. Twice the amount of purchase price of equipment damaged.

c. Thrice the amount of purchase price of equipment damaged.

d. Half the amount of purchase price of equipment damaged.

9. Any offence committed under Section 3 shall be:

(i) Cognizable (ii) Non bailable (iii)Non cognizable (iv)Bailable

a. i and ii

b. iii and iv

c. ii and iii

d. i and iv

10. FIR for a case of violence against HCWs, as per the new ordinance, is to be filed in:

a. 1 hour

b. 4 hour

c. 6 hour

d. 24 hour

e. Not specified.

11. A case of violence against HCWs, as per the new ordinance, will be expedited and judged within:

a. 3 months

b. 6 months

c. 9 months

d. 12 months

12. Which colour code is called in hospitals to alert staff to dangerous persons or criminal activity somewhere on the facilities’ premises?

a. Code Red

b. Code Blue

c. Code Pink

d. Code Grey

13. Which state in India is the first to implement Code Grey in hospital setting?

a. Tamil Nadu

b. Kerala

c. Goa

d. Maharashtra

14. Should there be mandatory training programmes for healthcare professionals to ensure a comprehensive understanding of the amended act?

a. Yes

b. No

15. To what extent do you think healthcare professionals are generally aware of their legal rights and protection under the amended legislation?

a. Fully aware

b. Partially aware

c. Unaware

16. Are you interested in participating in awareness programmes or workshops related to the Healthcare Service Persons and Healthcare Service Institutions Protection Act?

a. Yes

b. No

17. How well do you understand the key changes brought about by the recent amendment?

a. Very well

b. Somewhat

c. Not at all

18. What are your recommendations/ suggestions to improve the present Act? -----------------------------------------
